# Supplementary material
Source: ML conference proceedings conference paper supplement (https://proceedings.neurips.cc/paper_files/paper/2018/hash/fea9c11c4ad9a395a636ed944a28b51a-Abstract.html)
Supplement: Supplementary file [file fea9c11c4ad9a395a636ed944a28b51a-Supplemental.zip]

## A More Discussion on Finding the Negative Curvature

In this section, we present the gradient complexities of the negative curvature finding algorithms used in Section 4. Note that we use ApproxNC-Stochastic in Algorithm 1 to find the negative curvature direction, which is usually done by Oja's algorithm or Neon2<sup>online</sup> in stochastic nonconvex optimization problem (1.1). The following lemma characterizes the Hessian-vector product complexity of Oja's algorithm.

**Lemma A.1.** [4] Let  $f(\mathbf{x}) = \mathbb{E}_{\xi \sim \mathcal{D}}[F(\mathbf{x}; \xi)]$ , where each component function  $F(\mathbf{x}; \xi)$  is twice-differentiable and  $L_1$ -smooth. For any given point  $\mathbf{x} \in \mathbb{R}^d$ , if  $\lambda_{\min}(\nabla^2 f(\mathbf{x})) \leq -\epsilon_H$ , then with probability at least  $1 - \delta$ , Oja's algorithm returns a unit vector  $\hat{\mathbf{v}}$  satisfying

$$\hat{\mathbf{v}}^\top \nabla^2 f(\mathbf{x}) \hat{\mathbf{v}} < -\frac{\epsilon_H}{2},$$

with  $O((L_1^2/\epsilon_H^2) \log^2(d/\delta) \log(1/\delta))$  stochastic Hessian-vector product evaluations.

Next we present the gradient complexity for Neon2<sup>online</sup> [5] in the stochastic setting.

**Lemma A.2.** [5] Let  $f(\mathbf{x}) = \mathbb{E}_{\xi \sim \mathcal{D}}[F(\mathbf{x}; \xi)]$  where each component function  $F(\mathbf{x}; \xi)$  is  $L_1$ -smooth and  $L_2$ -Hessian Lipschitz continuous. For any given point  $\mathbf{x} \in \mathbb{R}^d$ , with probability at least  $1 - \delta$ , Neon2<sup>online</sup> returns  $\hat{\mathbf{v}}$  satisfying one of the following conditions,

- $\hat{\mathbf{v}} = \perp$ , then  $\lambda_{\min}(\nabla^2 f(\mathbf{x})) \geq -\epsilon_H$ .
- $\hat{\mathbf{v}} \neq \perp$ , then  $\hat{\mathbf{v}}^\top \nabla^2 f(\mathbf{x}) \hat{\mathbf{v}} \leq -\epsilon_H/2$  with  $\|\hat{\mathbf{v}}\|_2 = 1$ .

The total number of stochastic gradient evaluations is  $O((L_1^2/\epsilon_H^2) \log^2(d/\delta))$ .

## B Revisit of the SCSG Algorithm

In this section, for the purpose of self-containedness, we introduce the nonconvex stochastically controlled stochastic gradient (SCSG) algorithm [25] for general smooth nonconvex optimization problems with finite-sum structure, which is described in Algorithm 3.

---

**Algorithm 3** SCSG ( $f, \mathbf{x}_0, T, \eta, B, b, \epsilon$ )

---

```

1: initialization:  $\tilde{\mathbf{x}}_0 = \mathbf{x}_0$ 
2: for  $k = 1, 2, \dots, K$ 
3:   uniformly sample a batch  $\mathcal{S}_k \subset [n]$  with  $|\mathcal{S}_k| = B$ 
4:    $\mathbf{g}_k \leftarrow \nabla f_{\mathcal{S}_k}(\tilde{\mathbf{x}}_{k-1})$ 
5:    $\mathbf{x}_0^{(k)} \leftarrow \tilde{\mathbf{x}}_{k-1}$ 
6:   generate  $T_k \sim \text{Geom}(B/(B+b))$ 
7:   for  $t = 1, \dots, T_k$ 
8:     randomly pick  $\tilde{\mathcal{I}}_{t-1} \subset [n]$  with  $|\tilde{\mathcal{I}}_{t-1}| = b$ 
9:      $\boldsymbol{\nu}_{t-1}^{(k)} \leftarrow \nabla f_{\tilde{\mathcal{I}}_{t-1}}(\mathbf{x}_{t-1}^{(k)}) - \nabla f_{\tilde{\mathcal{I}}_{t-1}}(\mathbf{x}_0^{(k)}) + \mathbf{g}_k$ 
10:     $\mathbf{x}_t^{(k)} \leftarrow \mathbf{x}_{t-1}^{(k)} - \eta \boldsymbol{\nu}_{t-1}^{(k)}$ 
11:   end for
12:    $\tilde{\mathbf{x}}_k \leftarrow \mathbf{x}_{T_k}^{(k)}$ 
13: end for
14: output: Sample  $\tilde{\mathbf{x}}_K^*$  from  $\{\tilde{\mathbf{x}}_k\}_{k=1}^K$  uniformly.

```

---

The following lemma characterizes the function value gap after one epoch of Algorithm 3, which is a restatement of Theorem 3.1 in [25].

**Lemma B.1.** [25] Let each  $f_i$  be  $L_1$ -smooth. Set  $\eta L_1 = \gamma(B/b)^{-2/3}$ ,  $\gamma \leq 1/3$  and  $B \geq 8b$ . Then at the end of the  $k$ -th outer loop of Algorithm 3, it holds that

$$\mathbb{E}[\|\nabla f(\tilde{\mathbf{x}}_k)\|_2^2] \leq \frac{5L_1}{\gamma} \left(\frac{b}{B}\right)^{1/3} \mathbb{E}[f(\mathbf{x}_0^{(k)}) - f(\tilde{\mathbf{x}}_k)] + \frac{6 \mathbb{1}\{B < n\}}{B} \mathcal{V},$$

where  $\mathcal{V}$  is the upper bound on the variance of the stochastic gradient.

Next, we present a general extension of Lemma B.1 to the general stochastic setting in (1.1). In this case, we have  $\mathbf{g}_k = \nabla f_{\mathcal{S}_k}(\tilde{\mathbf{x}}_{k-1}) = 1/B \sum_{i \in \mathcal{S}_k} \nabla F(\tilde{\mathbf{x}}_{k-1}; \xi_i)$  and  $n$  is relatively large, i.e.,  $n \gg O(1/\epsilon^2)$ . Note that by [32] the sub-Gaussian stochastic gradient in Definition 3.7 implies  $\mathbb{E}[\|\nabla F(\mathbf{x}; \xi) - \nabla f(\mathbf{x})\|] \leq 2\sigma^2$  and thus we replace  $\mathcal{V} = 2\sigma^2$  in Corollary B.1. Then we have the following corollary.

**Corollary B.2.** Let each stochastic function  $F(\mathbf{x}; \xi)$  be  $L_1$ -smooth and suppose that  $\nabla F(\mathbf{x}; \xi)$  satisfies the gradient sub-Gaussian condition in Definition 3.7. Suppose that  $n \gg O(1/\epsilon^2)$  and  $n > B$ . Set parameters  $b \leq B/8$  and  $\eta = b^{2/3}/(3L_1B^{2/3})$ . Then at the end of the  $k$ -th outer loop of Algorithm 3, it holds that

$$\mathbb{E}[\|\nabla f(\tilde{\mathbf{x}}_k)\|_2^2] \leq \frac{15b^{1/3}L_1}{B^{1/3}}\mathbb{E}[f(\tilde{\mathbf{x}}_0^{(k)}) - f(\tilde{\mathbf{x}}_k)] + \frac{12\sigma^2}{B}.$$

## C Proofs for Negative Curvature Descent

In this section, we first prove the lemma that characterizes the function value decrease in our negative curvature descent algorithm, i.e., Algorithm 1.

### C.1 Proof of Lemma 4.1

*Proof.* By assumptions,  $f(\mathbf{x})$  is  $L_3$ -Hessian Lipschitz continuous, according to Lemma 1 in [6], for any  $\mathbf{x}, \mathbf{y} \in \mathbb{R}^d$ , we have

$$\begin{aligned} f(\mathbf{y}) &\leq f(\mathbf{x}) + \langle \nabla f(\mathbf{x}), \mathbf{y} - \mathbf{x} \rangle + \frac{1}{2}(\mathbf{y} - \mathbf{x})^\top \nabla^2 f(\mathbf{x})(\mathbf{y} - \mathbf{x}) \\ &\quad + \frac{1}{6}\langle \nabla^3 f(\mathbf{x}), (\mathbf{y} - \mathbf{x})^{\otimes 3} \rangle + \frac{L_3}{24}\|\mathbf{y} - \mathbf{x}\|_2^4. \end{aligned}$$

Denote the input point  $\mathbf{x}$  of Algorithm 1 as  $\mathbf{y}_0$ . Suppose that  $\hat{\mathbf{v}} \neq \perp$ . By Lemmas A.1 and A.2, the ApproxNC-Stochastic algorithm returns a unit vector  $\hat{\mathbf{v}}$  such that

$$\hat{\mathbf{v}}^\top \nabla^2 f(\mathbf{y}_0) \hat{\mathbf{v}} \leq -\frac{\epsilon_H}{2} \quad (\text{C.1})$$

holds with probability at least  $1 - \delta$  within  $\tilde{O}(L_1^2/\epsilon_H^2)$  evaluations of stochastic Hessian-vector product or stochastic gradient. Define  $\mathbf{u} = \mathbf{y}_0 + \alpha \hat{\mathbf{v}}$  and  $\mathbf{w} = \mathbf{y}_0 - \alpha \hat{\mathbf{v}}$ . Then it holds that

$$\sum_{\mathbf{y} \in \{\mathbf{u}, \mathbf{w}\}} \left( \langle \nabla f(\mathbf{y}_0), \mathbf{y} - \mathbf{y}_0 \rangle + \frac{1}{6}\langle \nabla^3 f(\mathbf{y}_0), (\mathbf{y} - \mathbf{y}_0)^{\otimes 3} \rangle \right) = 0.$$

Furthermore, recall that we have  $\hat{\mathbf{y}} = \mathbf{x} + \zeta \alpha \hat{\mathbf{v}}$  in Algorithm 1 where  $\zeta$  is a Rademacher random variable and thus we have  $\mathbb{P}(\zeta = 1) = \mathbb{P}(\hat{\mathbf{y}} = \mathbf{u}) = 1/2$  and  $\mathbb{P}(\zeta = -1) = \mathbb{P}(\hat{\mathbf{y}} = \mathbf{w}) = 1/2$ , which immediately implies

$$\begin{aligned} \mathbb{E}_\zeta[f(\hat{\mathbf{y}}) - f(\mathbf{y}_0)] &\leq \frac{1}{2}(\hat{\mathbf{y}} - \mathbf{y}_0)^\top \nabla^2 f(\mathbf{y}_0)(\hat{\mathbf{y}} - \mathbf{y}_0) + \frac{L_3}{24}\|\hat{\mathbf{y}} - \mathbf{y}_0\|_2^4 \\ &\leq \frac{\alpha^2}{2}\hat{\mathbf{v}}^\top \nabla^2 f(\mathbf{y}_0)\hat{\mathbf{v}} + \frac{L_3\alpha^4}{24}\|\hat{\mathbf{v}}\|_2^4 \\ &\leq -\frac{\alpha^2}{2}\frac{\epsilon_H}{2} + \frac{L_3\alpha^4}{24}\|\hat{\mathbf{v}}\|_2^4 \\ &= -\frac{3\epsilon_H^2}{8L_3} \end{aligned} \quad (\text{C.2})$$

holds with probability at least  $1 - \delta$ , where  $\mathbb{E}_\zeta$  denotes the expectation over  $\zeta$ , the third inequality follows from (C.1) and in the last equality we used the fact that  $\alpha = \sqrt{3\epsilon_H/L_3}$ . On the other hand, by  $L_2$ -smoothness of  $f$  (as each stochastic function  $F(\mathbf{x}; \xi)$  is  $L_2$ -Hessian Lipschitz continuous), we can derive that

$$\begin{aligned} \mathbb{E}_\zeta[f(\hat{\mathbf{y}}) - f(\mathbf{y}_0)] &\leq \frac{\alpha^2}{2}\hat{\mathbf{v}}^\top \nabla^2 f(\mathbf{y}_0)\hat{\mathbf{v}} + \frac{L_3\alpha^4}{24}\|\hat{\mathbf{v}}\|_2^4 \\ &\leq \frac{\alpha^2 L_2}{2} + \frac{L_3\alpha^4}{24}\|\hat{\mathbf{v}}\|_2^4 \\ &= \frac{3\epsilon_H(\epsilon_H + 4L_2)}{8L_3}. \end{aligned} \quad (\text{C.3})$$

Combining (C.2) and (C.3) yields

$$\begin{aligned}\mathbb{E}[f(\hat{\mathbf{y}}) - f(\mathbf{y}_0)] &\leq -\frac{3(1-\delta)\epsilon_H^2}{8L_3} + \frac{3\delta\epsilon_H(\epsilon_H + 4L_2)}{8L_3} \\ &\leq -\frac{3(1-\delta)\epsilon_H^2}{16L_3},\end{aligned}$$

where the second inequality holds if  $\delta \leq \epsilon_H/(3\epsilon_H + 8L_2)$ . Furthermore, plugging  $\delta < 1/3$  into the above inequality we obtain  $\mathbb{E}[f(\hat{\mathbf{y}}) - f(\mathbf{y}_0)] \leq -\epsilon_H^2/(8L_3)$ .  $\square$

## D Proofs for Runtime Complexity of Algorithms

In this section, we prove the main theorem for our stochastic local minima finding algorithm.

### D.1 Proof of Theorem 5.1

Before we prove theoretical results for the stochastic setting, we lay down the following useful lemma which states the concentration bound for sub-Gaussian random vectors.

**Lemma D.1.** [17] Suppose the stochastic gradient  $\nabla F(\mathbf{x}; \xi)$  is sub-Gaussian with parameter  $\sigma$ . Let  $\nabla f_S(\mathbf{x}) = 1/|\mathcal{S}| \sum_{i \in \mathcal{S}} \nabla F(\mathbf{x}; \xi_i)$  be a subsampled gradient of  $f$ . If the sample size  $|\mathcal{S}| = 2\sigma^2/\epsilon^2(1 + \sqrt{\log(1/\delta)})^2$ , then with probability  $1 - \delta$ ,

$$\|\nabla f_S(\mathbf{x}) - \nabla f(\mathbf{x})\|_2 \leq \epsilon$$

holds for any  $\mathbf{x} \in \mathbb{R}^d$ .

*Proof of Theorem 5.1.* We first calculate the outer loop iteration complexity of Algorithm 2. Let  $\mathcal{I} = \{1, 2, \dots, K\}$  be the index of iteration. We use  $\mathcal{I}_1$  and  $\mathcal{I}_2$  to denote the index set of iterates that are output by the NCD3-Stochastic stage and SCSG stage of Algorithm 2 respectively. It holds that  $K = |\mathcal{I}| = |\mathcal{I}_1| + |\mathcal{I}_2|$ . We will calculate  $|\mathcal{I}_1|$  and  $|\mathcal{I}_2|$  in sequence.

**Computing  $|\mathcal{I}_1|$ :** note that  $|\mathcal{I}_1|$  is the number of iterations that Algorithm 2 calls NCD3-Stochastic to find the negative curvature. Recall the result in Lemma 4.1, for  $k \in \mathcal{I}_1$ , one execution of the NCD3-Stochastic stage can reduce the function value up to

$$\mathbb{E}[f(\mathbf{x}_{k-1}) - f(\mathbf{x}_k)] \geq \frac{\epsilon_H^2}{8L_3}. \quad (\text{D.1})$$

To get the upper bound of  $|\mathcal{I}_1|$ , we also need to consider iterates output by One-epoch SCSG. By Lemma B.2 it holds that

$$\mathbb{E}[\|\nabla f(\mathbf{x}_k)\|_2^2] \leq \frac{C_1 L_1}{B^{1/3}} \mathbb{E}[f(\mathbf{x}_{k-1}) - f(\mathbf{x}_k)] + \frac{C_2 \sigma^2}{B}, \quad \text{for } k \in \mathcal{I}_2, \quad (\text{D.2})$$

where  $C_1 = 15b^{1/3}$ ,  $C_2 = 12$  are absolute constants, and we assume  $b \leq B/8$ .

As for  $k \in \mathcal{I}_2$ , we further decompose  $\mathcal{I}_2$  as  $\mathcal{I}_2 = \mathcal{I}_2^1 \cup \mathcal{I}_2^2$ , where  $\mathcal{I}_2^1 = \{k \in \mathcal{I}_2 \mid \|\mathbf{g}_k\|_2 > \epsilon/2\}$  and  $\mathcal{I}_2^2 = \{k \in \mathcal{I}_2 \mid \|\mathbf{g}_k\|_2 \leq \epsilon/2\}$ . It is easy to see that  $\mathcal{I}_2^1 \cap \mathcal{I}_2^2 = \emptyset$  and  $|\mathcal{I}_2| = |\mathcal{I}_2^1| + |\mathcal{I}_2^2|$ . In addition, according to the concentration result on  $\mathbf{g}_k$  and  $\nabla f(\mathbf{x}_k)$  in Lemma D.1, if the sample size  $B$  satisfies  $B = O(\sigma^2/\epsilon^2 \log(1/\delta_0))$ , then for any  $k \in \mathcal{I}_2^1$ ,  $\|\nabla f(\mathbf{x}_k)\|_2 > \epsilon/4$  holds with probability at least  $1 - \delta_0$ . For any  $k \in \mathcal{I}_2^2$ ,  $\|\nabla f(\mathbf{x}_k)\|_2 \leq \epsilon$  holds with probability at least  $1 - \delta_0$ . According to (D.2), we can derive that for any  $k \in \mathcal{I}_2^2$ ,

$$\mathbb{E}[f(\mathbf{x}_{k-1}) - f(\mathbf{x}_k)] \geq \frac{B^{1/3}}{C_1 L_1} \mathbb{E}[\|\nabla f(\mathbf{x}_k)\|_2^2] - \frac{C_2 \sigma^2}{C_1 L_1 B^{2/3}}, \quad \text{for } k \in \mathcal{I}_2^1. \quad (\text{D.3})$$

As for  $|\mathcal{I}_2^2|$ , because for any  $k \in \mathcal{I}_2^2$ ,  $\|\mathbf{g}_k\|_2 \leq \epsilon/2$ , which will lead the algorithm to execute one step of NCD3-Stochastic stage in the next iteration, i.e.,  $k$ -th iteration. Thus it immediately implies that  $|\mathcal{I}_2^2| \leq |\mathcal{I}_1|$ , and according to (D.2), we can also derive that

$$\mathbb{E}[f(\mathbf{x}_{k-1}) - f(\mathbf{x}_k)] \geq -\frac{C_2 \sigma^2}{C_1 L_1 B^{2/3}}, \quad \text{for } k \in \mathcal{I}_2^2. \quad (\text{D.4})$$

Summing up (D.1) over  $k \in \mathcal{I}_1$ , (D.3) over  $k \in \mathcal{I}_2^1$ , (D.4) over  $k \in \mathcal{I}_2^2$  and combining the results yields

$$\begin{aligned} \sum_{k \in \mathcal{I}} \mathbb{E}[f(\mathbf{x}_{k-1}) - f(\mathbf{x}_k)] &\geq \sum_{k \in \mathcal{I}_1} \frac{\epsilon_H^2}{8L_3} + \frac{B^{1/3}}{C_1 L_1} \sum_{k \in \mathcal{I}_2^1} \mathbb{E}[\|\nabla f(\mathbf{x}_k)\|_2^2] \\ &\quad - \sum_{k \in \mathcal{I}_2^1} \frac{C_2 \sigma^2}{C_1 L_1 B^{2/3}} - \sum_{k \in \mathcal{I}_2^2} \frac{C_2 \sigma^2}{C_1 L_1 B^{2/3}}, \end{aligned}$$

which immediately implies

$$\begin{aligned} \frac{|\mathcal{I}_1| \epsilon_H^2}{8L_3} + \frac{B^{1/3}}{C_1 L_1} \sum_{k \in \mathcal{I}_2^1} \mathbb{E}[\|\nabla f(\mathbf{x}_k)\|_2^2] &\leq \Delta_f + \sum_{k \in \mathcal{I}_2^1} \frac{C_2 \sigma^2}{C_1 L_1 B^{2/3}} + \sum_{k \in \mathcal{I}_2^2} \frac{C_2 \sigma^2}{C_1 L_1 B^{2/3}} \\ &\leq \Delta_f + \frac{|\mathcal{I}_2^1| C_2 \sigma^2}{C_1 L_1 B^{2/3}} + \frac{|\mathcal{I}_1| C_2 \sigma^2}{C_1 L_1 B^{2/3}}, \end{aligned}$$

where the first inequality uses the fact that  $\Delta_f = f(\mathbf{x}_0) - \inf_{\mathbf{x}} f(\mathbf{x})$  and the second inequality is due to  $|\mathcal{I}_2^2| \leq |\mathcal{I}_1|$ . Applying Markov inequality to the left-hand side of the first inequality above we have that

$$\begin{aligned} \frac{|\mathcal{I}_1| \epsilon_H^2}{8L_3} + \frac{B^{1/3}}{C_1 L_1} \sum_{k \in \mathcal{I}_2^1} \|\nabla f(\mathbf{x}_k)\|_2^2 &\leq 3\mathbb{E} \left[ \frac{|\mathcal{I}_1| \epsilon_H^2}{8L_3} + \frac{B^{1/3}}{C_1 L_1} \sum_{k \in \mathcal{I}_2^1} \|\nabla f(\mathbf{x}_k)\|_2^2 \right] \\ &\leq 3\Delta_f + \frac{3|\mathcal{I}_2^1| C_2 \sigma^2}{C_1 L_1 B^{2/3}} + \frac{3|\mathcal{I}_1| C_2 \sigma^2}{C_1 L_1 B^{2/3}} \end{aligned}$$

holds with probability at least  $1 - 1/3 = 2/3$ . Note that  $\|\nabla f(\mathbf{x}_k)\|_2 \geq \epsilon/4$  with probability at least  $1 - \delta_0$ . We conclude that by union bound we have that

$$\frac{|\mathcal{I}_1| \epsilon_H^2}{8L_3} + \frac{|\mathcal{I}_2^1| B^{1/3} \epsilon^2}{16C_1 L_1} \leq 3\Delta_f + \frac{3|\mathcal{I}_2^1| C_2 \sigma^2}{C_1 L_1 B^{2/3}} + \frac{3|\mathcal{I}_1| C_2 \sigma^2}{C_1 L_1 B^{2/3}}$$

holds with probability at least  $2/3(1 - \delta_0)^{|\mathcal{I}_2^1|}$ . We can set  $B$  such that

$$\frac{3C_2 \sigma^2}{C_1 L_1 B^{2/3}} \leq \frac{\epsilon_H^2}{16L_3},$$

which implies

$$B \geq \left( \frac{48C_2 L_3 \sigma^2}{C_1 L_1} \right)^{3/2} \frac{1}{\epsilon_H^3}. \quad (\text{D.5})$$

Combining the above two inequalities yields

$$\frac{|\mathcal{I}_1| \epsilon_H^2}{16L_3} + \frac{|\mathcal{I}_2^1| B^{1/3} \epsilon^2}{16C_1 L_1} \leq 3\Delta_f + \frac{3|\mathcal{I}_2^1| C_2 \sigma^2}{C_1 L_1 B^{2/3}} \quad (\text{D.6})$$

holds with probability at least  $2/3(1 - \delta_0)^{|\mathcal{I}_2^1|}$ . Therefore, it holds with probability at least  $2/3(1 - \delta_0)^{|\mathcal{I}_2^1|}$  that

$$|\mathcal{I}_1| \leq \frac{48L_3 \Delta_f}{\epsilon_H^2} + \frac{48C_2 L_3 \sigma^2}{C_1 L_1 B^{2/3} \epsilon_H^2} |\mathcal{I}_2^1| = O\left(\frac{L_3 \Delta_f}{\epsilon_H^2}\right) + \tilde{O}\left(\frac{L_3 \sigma^2}{L_1 B^{2/3} \epsilon_H^2}\right) |\mathcal{I}_2^1|. \quad (\text{D.7})$$

As we can see from the above inequality, the upper bound of  $|\mathcal{I}_1|$  is related to the upper bound of  $|\mathcal{I}_2^1|$ . We will derive the upper bound on  $|\mathcal{I}_2^1|$  later.

**Computing  $|\mathcal{I}_2|$ :** we have shown that  $|\mathcal{I}_2^2| \leq |\mathcal{I}_1|$ . Thus we only need to compute the cardinality of subset  $\mathcal{I}_2^1 \subset \mathcal{I}_2$ , where  $\|\mathbf{g}_k\|_2 > \epsilon/2$  for any  $k \in \mathcal{I}_2^1$ . By Lemma D.1 we can derive that with probability at least  $1 - \delta_0$ , it holds that  $\|\nabla f(\mathbf{x}_k)\|_2 > \epsilon/4$ . According to (D.6), we have

$$\frac{|\mathcal{I}_2^1| B^{1/3} \epsilon^2}{16C_1 L_1} \leq \frac{|\mathcal{I}_1| \epsilon_H^2}{16L_3} + \frac{|\mathcal{I}_2^1| B^{1/3} \epsilon^2}{16C_1 L_1} \leq 3\Delta_f + \frac{3|\mathcal{I}_2^1| C_2 \sigma^2}{C_1 L_1 B^{2/3}} \quad (\text{D.8})$$

holds with probability at least  $2/3(1 - \delta_0)^{|\mathcal{I}_2^1|}$ . Further ensure that  $B$  satisfies

$$\frac{3C_2\sigma^2}{C_1L_1B^{2/3}} \leq \frac{B^{1/3}\epsilon^2}{32C_1L_1},$$

which implies

$$B \geq \frac{96C_2\sigma^2}{\epsilon^2}. \quad (\text{D.9})$$

Finally we get the upper bound of  $|\mathcal{I}_2^1|$ ,

$$|\mathcal{I}_2^1| \leq \frac{96C_1L_1\Delta_f}{B^{1/3}\epsilon^2} = \tilde{O}\left(\frac{L_1\Delta_f}{\sigma^{2/3}\epsilon^{4/3}}\right), \quad (\text{D.10})$$

where in the equation we use the fact in (D.5) and (D.9), and the condition that  $B = \tilde{O}(\sigma^2/\epsilon^2)$  and  $\epsilon_H \gtrsim \epsilon^{2/3}$ , which makes the large batch size  $B$  also satisfies the condition in (D.5).

More specifically, the starting point to upper bound  $|\mathcal{I}_2^1|$  is equation (D.8). We choose sufficient large  $B$  (as suggested in equation (D.9)) to ensure the second term in R.H.S of (D.8) is less than half of the L.H.S. of (D.8). Therefore, we can get the upper bound of  $|\mathcal{I}_2^1|$  in (D.10).

We then plug the upper bound of  $|\mathcal{I}_2^1|$  into (D.7) to obtain the upper bound of  $\mathcal{I}_1$ . Note that  $B = \tilde{O}(\sigma^2/\epsilon^2)$ . Then we have

$$\begin{aligned} |\mathcal{I}_1| &\leq \frac{48L_3\Delta_f}{\epsilon_H^2} + \frac{48C_2L_3\sigma^2}{C_1L_1B^{2/3}\epsilon_H^2}|\mathcal{I}_2^1| \\ &= \tilde{O}\left(\frac{L_3\Delta_f}{\epsilon_H^2}\right) + \tilde{O}\left(\frac{L_3\sigma^{2/3}\epsilon^{4/3}}{L_1\epsilon_H^2}\right) \cdot \tilde{O}\left(\frac{L_1\Delta_f}{\sigma^{2/3}\epsilon^{4/3}}\right) \\ &= \tilde{O}\left(\frac{L_3\Delta_f}{\epsilon_H^2}\right) \end{aligned}$$

holds with probability at least  $2/3(1 - \delta_0)^{|\mathcal{I}_2^1|}$ , where we take  $B = \tilde{O}(\sigma^2/\epsilon^2)$  in the first equality. Choosing sufficient small  $\delta_0$  such that  $(1 - \delta_0)^{|\mathcal{I}_2^1|} > 1/2$ , the upper bound of  $\mathcal{I}_1$  and  $\mathcal{I}_2^1$  holds with probability at least  $1/3$ .

**Computing Runtime:** By Lemma 4.1 we know that each call of the NCD3-Stochastic algorithm takes  $\tilde{O}((L_1^2/\epsilon_H^2)\mathbb{T}_h)$  runtime if Oja's algorithm is used and  $\tilde{O}((L_1^2/\epsilon_H^2)\mathbb{T}_g)$  runtime if Neon2<sup>online</sup> is used. On the other hand, Corollary B.2 shows that the complexity of one epoch of SCSG algorithm is  $\tilde{O}(\sigma^2/\epsilon^2)$  which implies that the run time of one epoch of SCSG algorithm is  $\tilde{O}((\sigma^2/\epsilon^2)\mathbb{T}_g)$ . Therefore, we can compute the total time complexity of Algorithm 2 with online Oja's algorithm as follows

$$\begin{aligned} &|\mathcal{I}_1| \cdot \tilde{O}\left(\frac{L_1^2}{\epsilon_H^2}\mathbb{T}_h\right) + |\mathcal{I}_2| \cdot \tilde{O}\left(\frac{\sigma^2}{\epsilon^2}\mathbb{T}_g\right) \\ &= |\mathcal{I}_1| \cdot \tilde{O}\left(\frac{L_1^2}{\epsilon_H^2}\mathbb{T}_h\right) + (|\mathcal{I}_2^1| + |\mathcal{I}_2^2|) \cdot \tilde{O}\left(\frac{\sigma^2}{\epsilon^2}\mathbb{T}_g\right) \\ &\leq |\mathcal{I}_1| \cdot \tilde{O}\left(\frac{L_1^2}{\epsilon_H^2}\mathbb{T}_h\right) + (|\mathcal{I}_2^1| + |\mathcal{I}_1|) \cdot \tilde{O}\left(\frac{\sigma^2}{\epsilon^2}\mathbb{T}_g\right). \end{aligned}$$

Plugging the upper bounds of  $|\mathcal{I}_1|$  and  $|\mathcal{I}_2^1|$  into the above equation yields the following runtime complexity of Algorithm 2 with online Oja's algorithm

$$\begin{aligned} &\tilde{O}\left(\frac{L_3\Delta_f}{\epsilon_H^2}\right) \cdot \tilde{O}\left(\frac{L_1^2}{\epsilon_H^2}\mathbb{T}_h\right) + \tilde{O}\left(\frac{L_1\Delta_f}{\sigma^{2/3}\epsilon^{4/3}} + \frac{L_3\Delta_f}{\epsilon_H^2}\right) \cdot \tilde{O}\left(\frac{\sigma^2}{\epsilon^2}\mathbb{T}_g\right) \\ &= \tilde{O}\left(\left(\frac{L_1\sigma^{4/3}\Delta_f}{\epsilon^{10/3}} + \frac{L_3\sigma^2\Delta_f}{\epsilon^2\epsilon_H^2}\right)\mathbb{T}_g + \left(\frac{L_1^2L_3\Delta_f}{\epsilon_H^4}\right)\mathbb{T}_h\right), \end{aligned}$$

and the runtime complexity of Algorithm 2 with Neon2<sup>online</sup> is

$$\tilde{O}\left(\left(\frac{L_1\sigma^{4/3}\Delta_f}{\epsilon^{10/3}} + \frac{L_3\sigma^2\Delta_f}{\epsilon^2\epsilon_H^2} + \frac{L_1^2L_3\Delta_f}{\epsilon_H^4}\right)\mathbb{T}_g\right),$$

which concludes our proof.  $\square$
